# Supplementary material for: Biomimetic photonic crystal double-network hydrogel for visual and electrical dual signal bluetooth-enabled wearable sensor
Source: Royal Society of Chemistry journal article supplement (doi:10.1039/d4tc00998c), 2024-01-01
Supplement: d4tc00998c3.pdf [file d4tc00998c3.pdf]

## Supporting Information

### **Biomimetic Photonic Crystal Double-network Hydrogel for Visual and Electrical Dual Signals Bluetooth-Enabled Wearable Sensor**

Aojue Ke<sup>1</sup>, Chunhao Li<sup>1</sup>, Boheng Dong<sup>1</sup>, Xinya Zhang<sup>1\*</sup>

<sup>1</sup>School of Chemistry and Chemical Engineering, Guangdong Provincial Key Lab of Green Chemical Product Technology, South China University of Technology, Guangzhou, 510640, P.R. China

\* Corresponding author (Xinya Zhang) E-mail: [cexyzh@scut.edu.cn](mailto:cexyzh@scut.edu.cn)

This file includes Supporting Figure S1–S13, Supporting Table S1–S4, and Supporting Movie S1-S2.



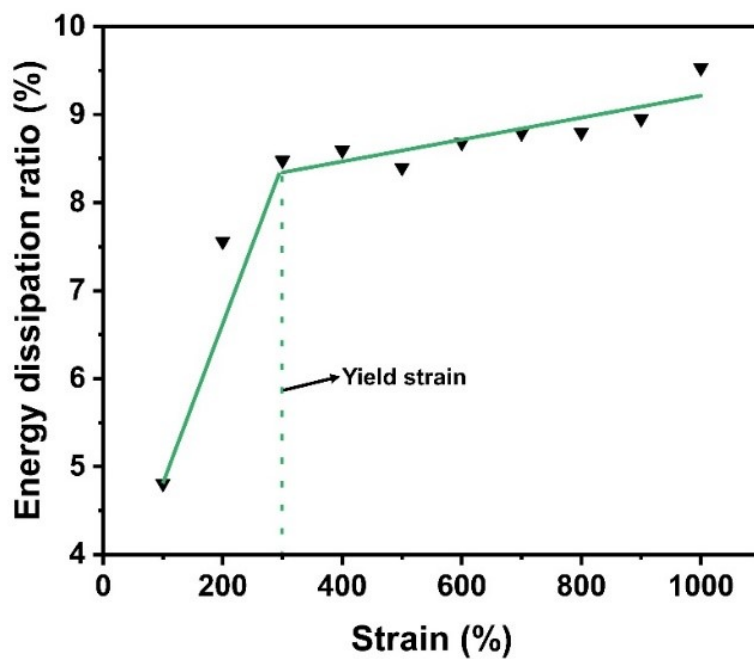

**Figure S3.** Dissipated energy ratio of the CNF<sub>1.0</sub>/PASA hydrogel.

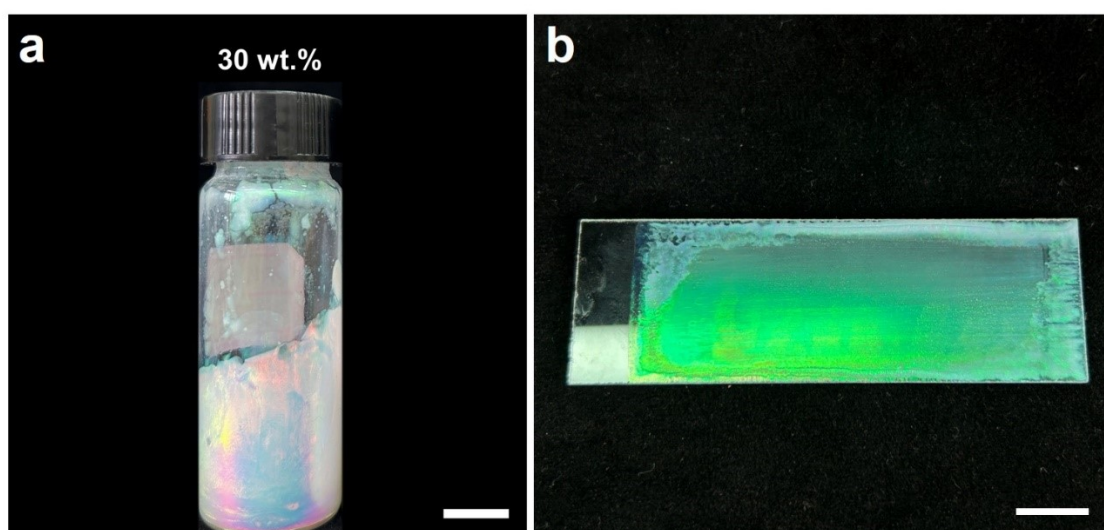

**Figure S4.** Digital image of a) the PS colloidal crystals and b) PC array. The scale bar is 1 cm.

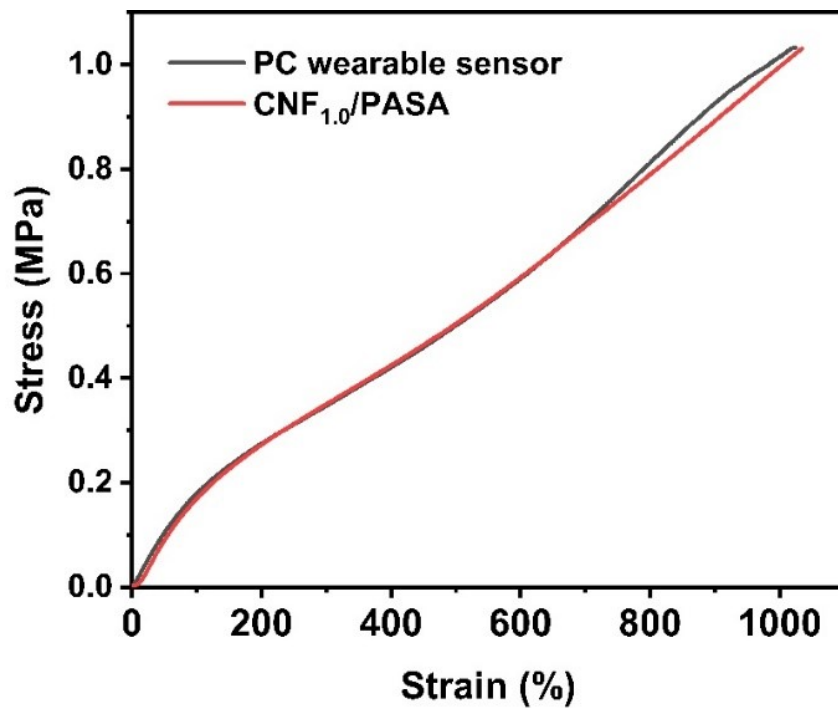

**Figure S5.** Stress–strain curves of PC wearable sensor and the CNF<sub>1.0</sub>/PASA hydrogel.

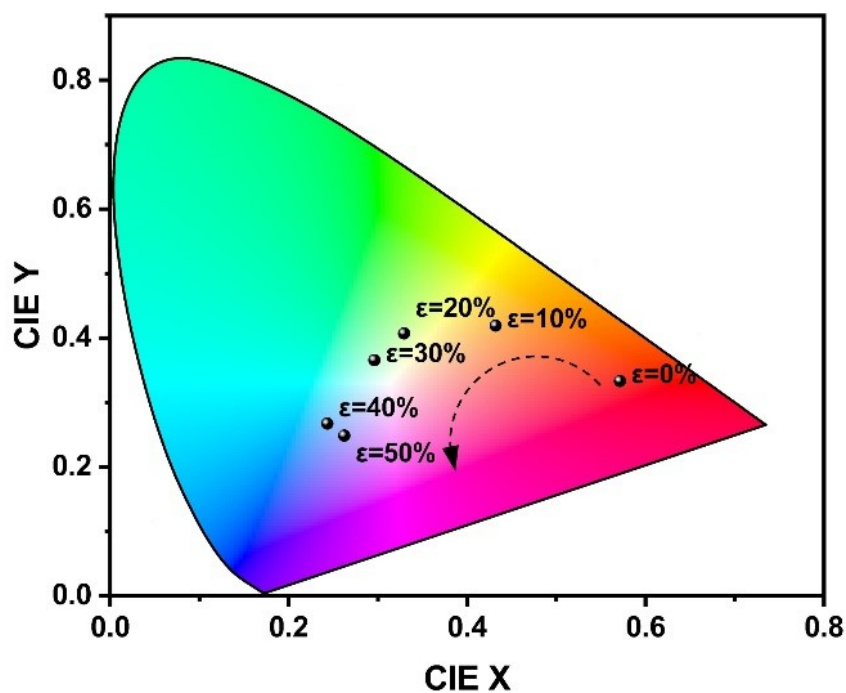

**Figure S6.** CIE 1931 chromaticity diagram of the PC wearable sensor under different strains (0–50%).

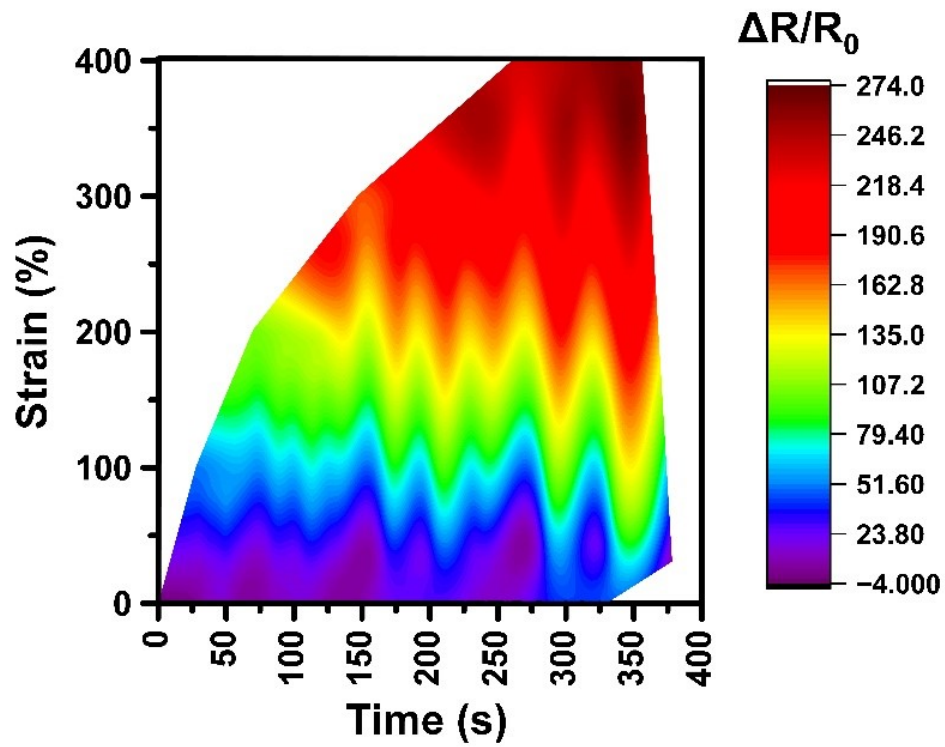

Figure S7. Real-time changes of the relative resistance at 0–400% strains.

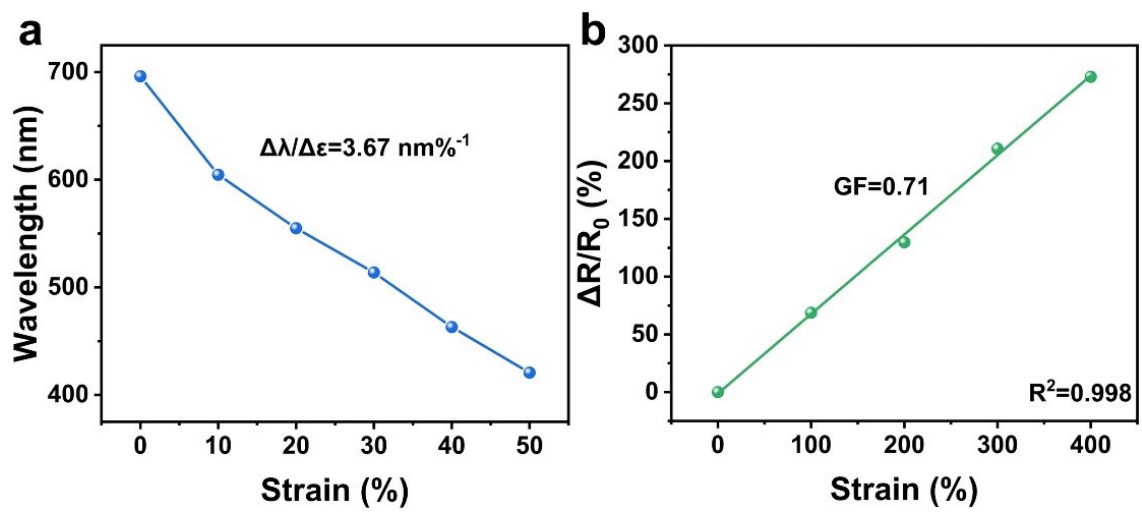

Figure S8. a) Mechanochromic sensitivity and b) GF of the PC wearable sensor.

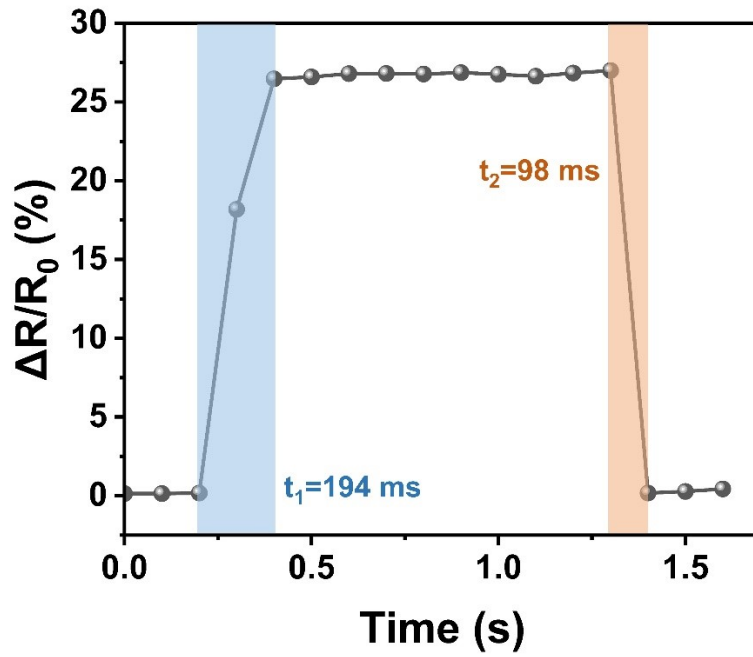

Figure S9. Time response of the PC sensor at a strain of 40%.

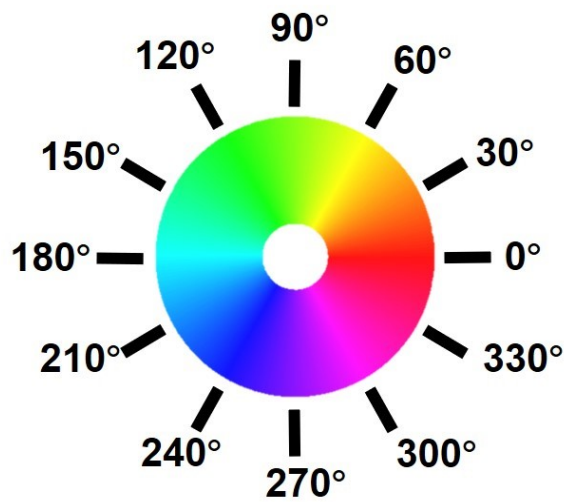

Figure S10. Hue circle.

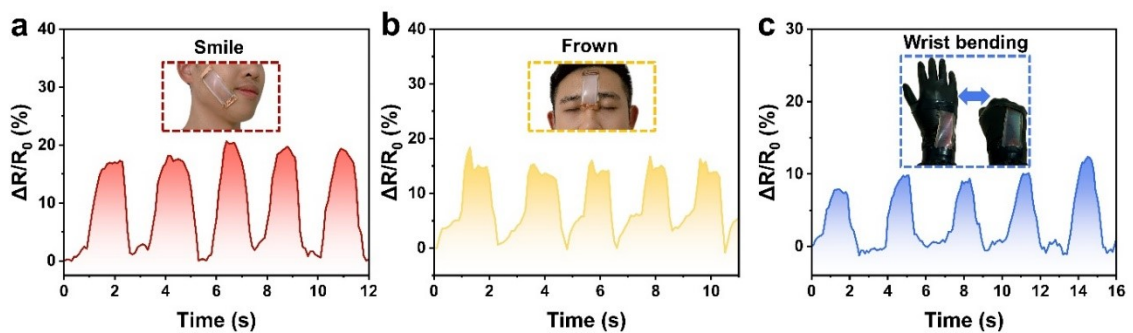

Figure S11. PC wearable sensor to monitor human motion, including a) smile, b) frown and c) wrist bending.



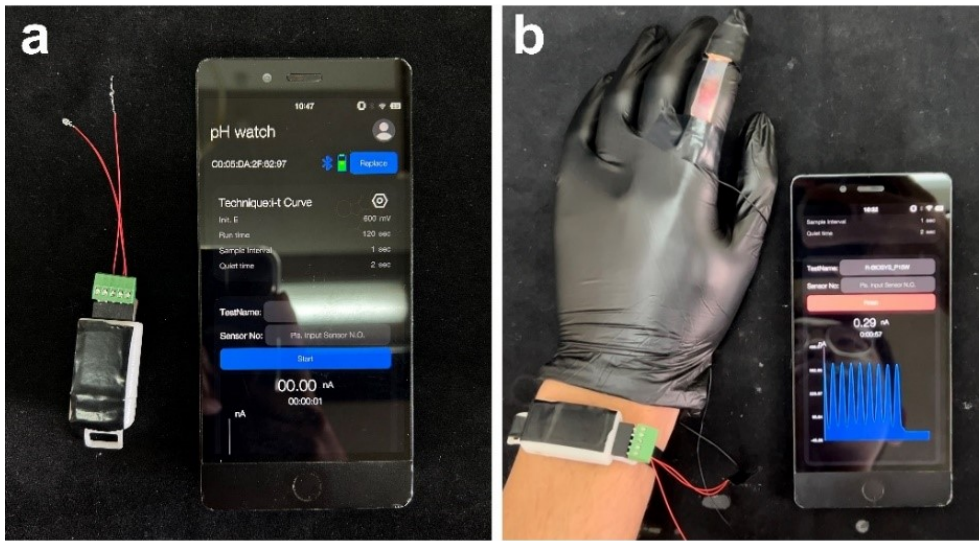

**Figure S12.** a) wireless miniature electronic device with Bluetooth module and smartphone. b) visual and electrical dual signal output in real-time human motion detection.

18:44 18:44

☰ 系统说明书V2.3 ☰ 系统说明书V2.3

PC wearable sensor PC wearable sensor

---

Personal Center

device mac or name

Test Personal

All

All

🔍 Search

| Duration | Comment   | Create Name     | Up |
|----------|-----------|-----------------|----|
| 6s       | i-t Curve | PC wearable ... |    |
| 1m 51s   | i-t Curve | PC wearable ... |    |
| 2m 3s    | i-t Curve | PC wearable ... |    |
| 2m 4s    | i-t Curve | PC wearable ... |    |
| 1m 7s    | i-t Curve | PC wearable ... |    |
| 1m 17s   | i-t Curve | PC wearable ... |    |
| 50s      | i-t Curve | PC wearable ... |    |
|          | i-t Curve | PC wearable ... |    |

Personal Center

device mac or name

Test Personal

All

All

🔍 Search

| Report | Operation           |
|--------|---------------------|
|        | ExDa Share Edit Del |

Copyright © 2021 RESYS 1.0 All rights reserved. Copyright © 2021 RESYS 1.0 All rights reserved.

大小 不安全 — biosys.refresh.cc 大小 不安全 — biosys.refresh.cc

< > ⬆️ 📖 📄

**Figure S13.** Cloud database of human motion detection.



## Supporting Tables

**Table S1.** The formulation for fabricating various hydrogels with different CNF concentrations.

| Samples | CNF<br>[g] | H <sub>2</sub> O<br>[g] | AAm<br>[mmol] | SBMA<br>[mmol] | AAc<br>[mmol] | BIS<br>[mmol] | Irgacure<br>2959<br>[mmol] | NaCl<br>[mmol] | Named                    |
|---------|------------|-------------------------|---------------|----------------|---------------|---------------|----------------------------|----------------|--------------------------|
| 1       | 0          | 8.0                     | 100.0         | 5.0            | 5.0           | 0.1           | 0.5                        | 2.0            | PASA                     |
| 2       | 0.04       | 8.0                     | 100.0         | 5.0            | 5.0           | 0.1           | 0.5                        | 2.0            | CNF <sub>0.5</sub> /PASA |
| 3       | 0.08       | 8.0                     | 100.0         | 5.0            | 5.0           | 0.1           | 0.5                        | 2.0            | CNF <sub>1.0</sub> /PASA |
| 4       | 0.16       | 8.0                     | 100.0         | 5.0            | 5.0           | 0.1           | 0.5                        | 2.0            | CNF <sub>2.0</sub> /PASA |

**Table S2.** Mechanical properties of different hydrogels.

| Samples                               | Fracture<br>strength | Fracture<br>strain | Recovery<br>ratio | Dissipated energy<br>ratio | Ref.      |
|---------------------------------------|----------------------|--------------------|-------------------|----------------------------|-----------|
| CNF <sub>1.0</sub> /PASA              | 1.03 MPa             | 1034.0%            | 93.1%             | 9.52%                      | This work |
| PAAm-PAAcNa                           | 0.40 MPa             | 390.0%             | 85.0%             | 85.0%                      | 1         |
| PSBMA/SA-<br>Ca <sup>2+</sup>         | 0.73 MPa             | 400.0%             | 63.0%             | 76.3%                      | 2         |
| PAA-CNF-Fe <sup>3+</sup>              | 1.37 MPa             | 1803.0%            | 95.0%             | 82.8%                      | 3         |
| WEQ-PA-Fe <sup>3+</sup>               | 1.90 MPa             | 750.0%             | 87.0%             | 39.0%                      | 4         |
| SA/P(AAm-co-<br>AAc)/Fe <sup>3+</sup> | 3.24 MPa             | 1228.0%            | 62.0%             | 85.0%                      | 5         |

**Table S3.** Color values of CIE chromaticity coordinates of the PC wearable sensor during certain tensile strains (0–50%).

| Tensile strains | x    | y    | L*     | a*     | b*     |
|-----------------|------|------|--------|--------|--------|
| 0%              | 0.57 | 0.33 | 271.68 | 269.45 | 178.26 |
| 10%             | 0.43 | 0.42 | 417.56 | 51.28  | 233.12 |
| 20%             | 0.33 | 0.41 | 409.90 | -96.27 | 116.97 |
| 30%             | 0.30 | 0.37 | 416.73 | -97.00 | 39.28  |
| 40%             | 0.24 | 0.27 | 391.98 | -24.92 | 133.22 |
| 50%             | 0.26 | 0.25 | 199.53 | 32.70  | -80.91 |

**Table S4.** Mechanochromic sensitivity of different photonic crystal hydrogels.

| Samples            | Mechanochromic sensitivity<br>[nm% <sup>-1</sup> ] | Ref.             |
|--------------------|----------------------------------------------------|------------------|
| PC wearable sensor | 3.67                                               | <b>This work</b> |
| PC sensor          | 2.09                                               | 6                |
| PI-skin            | 1.87                                               | 7                |
| Dual-Mode Fiber    | 1.51                                               | 8                |
| PCs sensor         | 1.50                                               | 9                |

## **Supporting Movies**

**Movie S1.** Changes of the structural color in PC wearable sensor during stretching and releasing.

**Movie S2.** Visual and electrical dual-signal output of the integrated wireless PC wearable sensor.

## References

- 1 Y. Yue, Y. Yokota and G. Matsuba, *Macromolecules*, 2022, **55**, 1230–1238.
- 2 J. Zhang, S. Qian, L. Chen, L. Chen, L. Zhao and J. Feng, *J. Mater. Sci. Technol.*, 2021, **85**, 235–244.
- 3 C. Shao, H. Chang, M. Wang, F. Xu and J. Yang, *ACS Appl. Mater. Interfaces*, 2017, **9**, 28305–28318.
- 4 Y. Huang, L. Xiao, J. Zhou, T. Liu, Y. Yan, S. Long and X. Li, *Adv. Funct. Mater.*, 2021, **31**, 2103917.
- 5 X. Li, H. Wang, D. Li, S. Long, G. Zhang and Z. Wu, *ACS Appl. Mater. Interfaces*, 2018, **10**, 31198–31207.
- 6 Q. Li, S. Liu, J. Wang, N. Mondele Mbola, Z. Meng, X. Wang and M. Xue, *J. Mater. Chem. C*, 2022, **10**, 9025–9034.
- 7 M. Zhao, P. Ren, Q. Lyu, X. Chen, H. Wang, M. Li, L. Zhang and J. Zhu, *Chem. Eng. J.*, 2023, **470**, 143937.
- 8 R. Zhao, Y. He, Y. He, Z. Li, M. Chen, N. Zhou, G. Tao and C. Hou, *ACS Appl. Mater. Interfaces*, 2023, **15**, 16063–16071.
- 9 S. Liu, Q. Li, J. Wang, X. Wang, N. M. Mbola, Z. Meng and M. Xue, *ACS Appl. Mater. Interfaces*, 2023, **15**, 2192–2203.
